# Supplementary material for: A neutrophil-mimetic magnetic nanoprobe for molecular magnetic resonance imaging of stroke-induced neuroinflammation
Source: Royal Society of Chemistry journal article supplement (doi:10.1039/d1bm00566a), 2021-01-01
Supplement: d1bm00566a1.pdf [file d1bm00566a1.pdf]

## Supporting Information

### **A neutrophil-mimetic magnetic nanoprobe for molecular magnetic resonance imaging of stroke-induced neuroinflammation**

Chunming Tang<sup>† a</sup>, Qianqian Wang<sup>† a</sup>, Kaiming Li<sup>a</sup>, Xiuqi Li<sup>a</sup>, Cong Wang<sup>a</sup>, Lingjing Xue<sup>a</sup>, Caoyun Ju<sup>\* a</sup>, Can Zhang<sup>\* a</sup>

<sup>a</sup>State Key Laboratory of Natural Medicines, Jiangsu Key Laboratory of Drug Discovery for Metabolic Diseases, Center of Advanced Pharmaceuticals and Biomaterials, China Pharmaceutical University, Nanjing 210009, P.R. China

\* Correspondence to:

Can Zhang, Ph.D., State Key Laboratory of Natural Medicines, Jiangsu Key Laboratory of Drug Discovery for Metabolic Diseases, Center of Advanced Pharmaceuticals and Biomaterials, China Pharmaceutical University, Nanjing, P.R. China

E-mail: zhangcan@cpu.edu.cn

Caoyun Ju, Ph.D., State Key Laboratory of Natural Medicines, Jiangsu Key Laboratory of Drug Discovery for Metabolic Diseases, Center of Advanced Pharmaceuticals and Biomaterials, China Pharmaceutical University, Nanjing, P.R. China

E-mail: jucaoyun@cpu.edu.cn

<sup>†</sup> Authors contributed equally to this work.

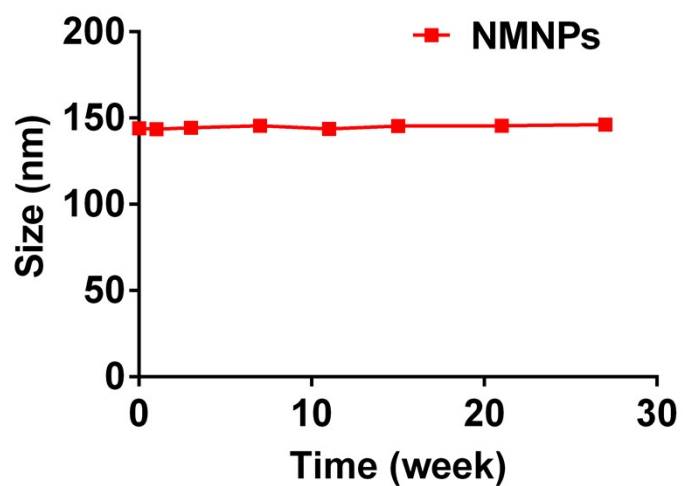

**Figure S1.** Stability of MNPs in aqueous solution monitored by dynamic light scattering at 4 °C. All values are expressed as mean  $\pm$  SD (n = 3).

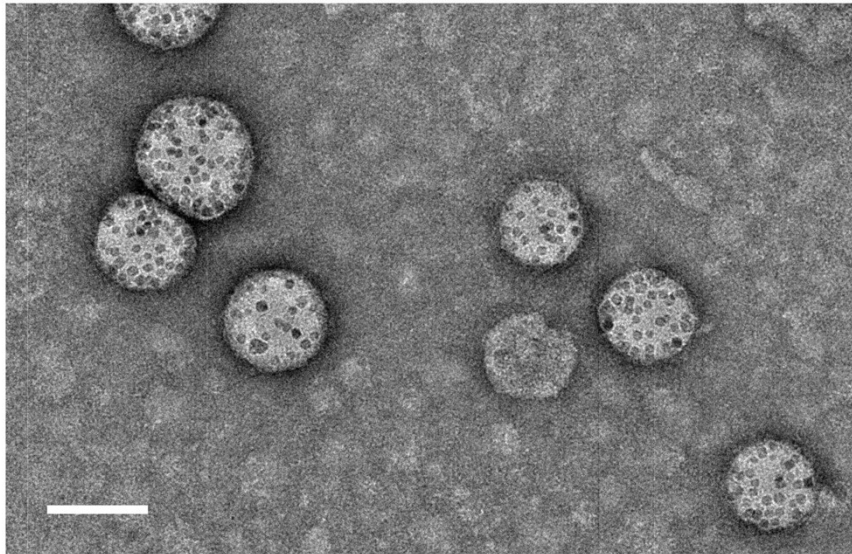

**Figure S2.** TEM image of MNPs. Scale bar = 100 nm.

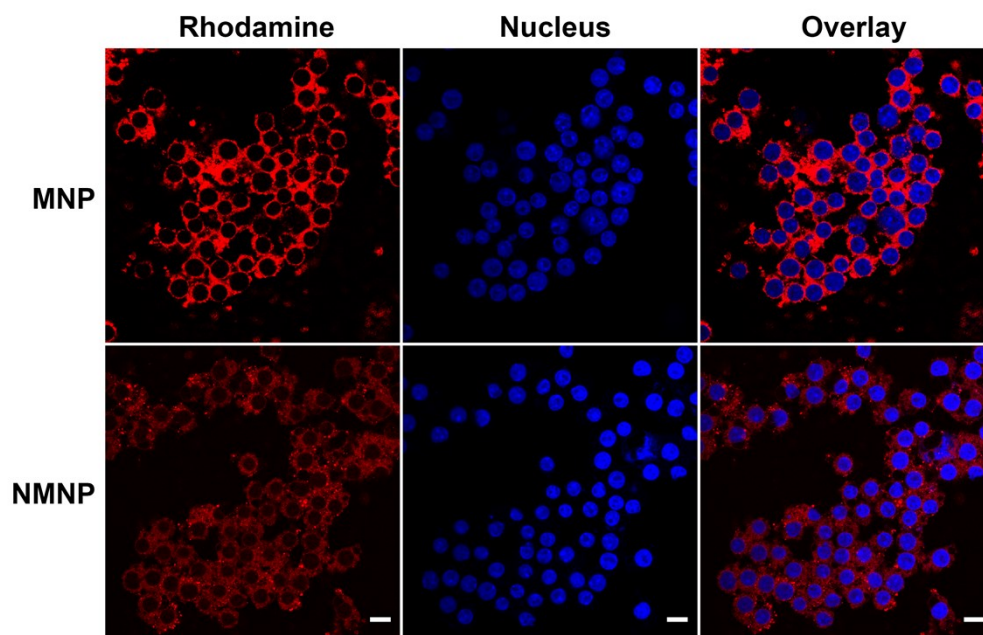

**Figure S3.** Intracellular uptake of MNPs and NMNPs by RAW264.7 cells after 1 h incubation. The nucleus was stained with Hoechst 33342 (blue). The MNPs and NMNPs were labelled with rhodamine (red). Scale bars, 5  $\mu\text{m}$ .

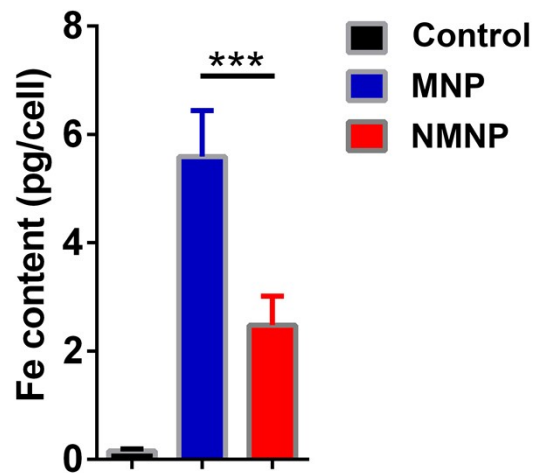

**Figure S4.** Quantitative analysis of the macrophage uptake of MNPs and NMNPs at  $100 \mu\text{g Fe mL}^{-1}$  concentration concentrations for 4 h incubation. All values are expressed as mean  $\pm$  SD (n = 6). \*\*\* $P < 0.001$  (two-tailed Student's *t*-test).

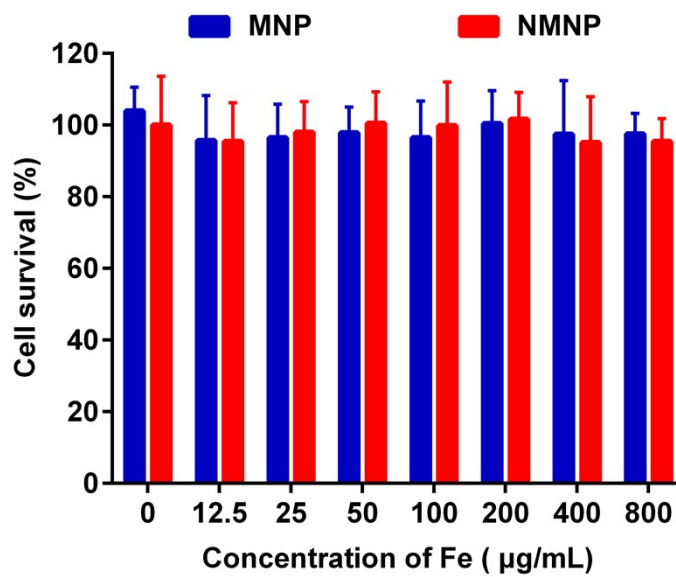

**Figure S5.** HUVEC viability after incubation with MNPs and NMNPs at different concentrations. All values are expressed as mean  $\pm$  SD (n = 6).

**Table S1.** The content of SPIO, PLGA, and neutrophil membrane in MNPs and NMNPs.

| Formulations | SPIO (%) | PLGA (%) | neutrophil membrane (%) |
|--------------|----------|----------|-------------------------|
| MNPs         | 38.84    | 61.16    | 0                       |
| NMNPs        | 28.67    | 45.15    | 26.18                   |
